# Supplementary material
Source: PubMed Central journal article supplement (PMC9219168)

# Figure S1

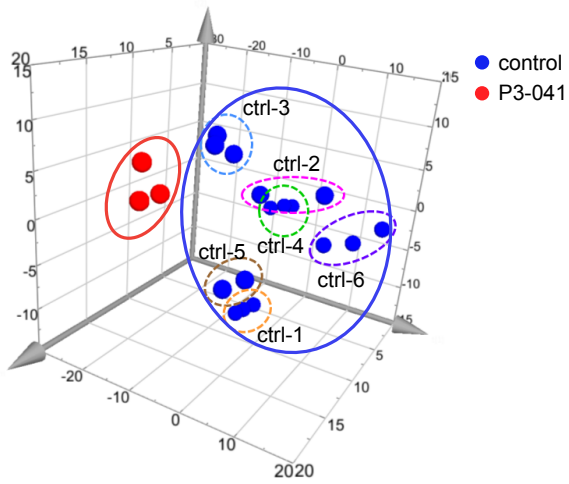

| Label  | Cell line                                | Resource                                              |
|--------|------------------------------------------|-------------------------------------------------------|
| ctrl-1 | Detroit 551                              | ATCC, CCL-110                                         |
| ctrl-2 | Primary adult dermal fibroblast, HDFa    | ATCC, PCS-201-012                                     |
| ctrl-3 | Primary neonatal dermal fibroblast, HDFn | ATCC, PCS-201-010                                     |
| ctrl-4 | P3131                                    | Pathology core of Children's Medical Center at Dallas |
| ctrl-5 | P4170                                    | Pathology core of Children's Medical Center at Dallas |
| ctrl-6 | BJ                                       | ATCC, CRL-2522                                        |

Figure S2

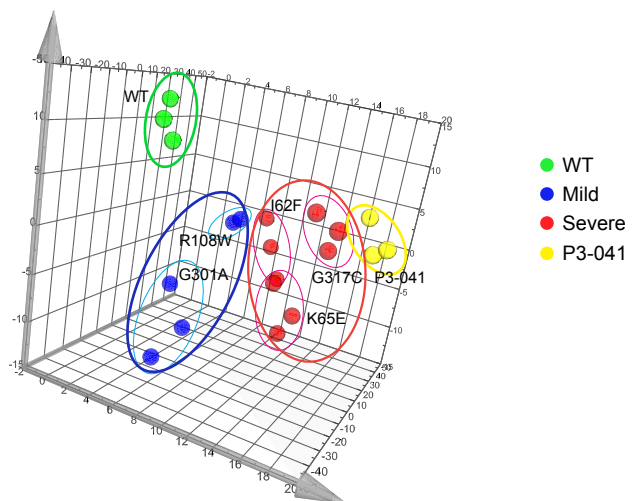

Supplement: NIHMS1808778-supplement-supplementary_figure.pdf [file NIHMS1808778-supplement-supplementary_figure.pdf]
